# Supplementary material for: UV and visible light synergetic photodegradation using rutile TiO2 nanorod arrays based on a p–n Junction
Source: Royal Society of Chemistry journal article supplement (doi:10.1039/c7dt00261k), 2017-01-01
Supplement: c7dt00261k1.pdf [file c7dt00261k1.pdf]

## Electronic Supplementary Information

### UV and Visible Lights Synergetic Photodegradation Using Rutile TiO<sub>2</sub> Nanorod Arrays Based on a p-n Junction

Tao Ji<sup>1,2</sup>, Ze Cui<sup>2</sup>, Wenlong Zhang<sup>1</sup>, Yunjiu Cao<sup>1,2</sup>, Yongfang Zhang<sup>1</sup>, Yangang Sun<sup>\*,2</sup>, Rujia Zou<sup>1</sup> and Junqing Hu<sup>\*,1</sup>

<sup>1</sup>*State Key Laboratory for Modification of Chemical Fibers and Polymer Materials, College of Materials Science and Engineering, Donghua University, Shanghai 201620, China*

<sup>2</sup>*School of Fundamental Studies, Shanghai University of Engineering Science, Shanghai, 201620, China*

*\*Corresponding Authors: Junqing Hu (e-mail: [hu.junqing@dhu.edu.cn](mailto:hu.junqing@dhu.edu.cn)) and Yangang Sun (e-mail: [syg021@sues.edu.cn](mailto:syg021@sues.edu.cn))*

[\*] Mr. T. Ji, W. L. zhang, Y. J. Cao, Mrs. Y. F. Zhang, Drs. R. J. Zou, Q. Liu, Y.G. Sun,

Prof./Dr. J. Q. Hu

State Key Laboratory for Modification of Chemical Fibers and Polymer Materials, College of Materials Science and Engineering, Donghua University, Shanghai, 201620, China

E-mail: [hu.junqing@dhu.edu.cn](mailto:hu.junqing@dhu.edu.cn)

Mr. T. Ji, Z. Cui, Y. J. Cao, Prof./Dr. Y.G. Sun

School of Fundamental Studies, Shanghai University of Engineering Science, Shanghai, 201620, China

## Part I: Reaction Equation

The reaction mechanism can be described as the following steps,

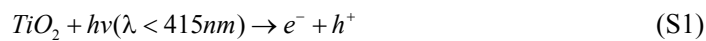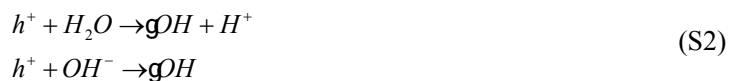

The part of Sunlight with wavelength less than 415 nm generated electron-hole pairs in the  $\text{TiO}_2$  (Eq. (1)), most of the other light would produce photovoltaic (PV) voltage at the PN junction. Because of the applied PV voltage by PN junction, photo-generated holes were left on the surface of  $\text{TiO}_2@\text{PN}$ . And the holes ( $h^+$ ) produced hydroxyl radicals ( $\cdot\text{OH}$ ).

The photocatalytic activity (PCA) could be reflected from the following equation:

$$PCA = \frac{m_P}{m_C} \frac{1}{t} \quad (\text{S3})$$

Where  $m_P$  is the quality of the degraded model pollutant (MO, MB or Rhodamine B),  $m_C$  is the quality of the catalyst used, t is the time of degradation to 90%.

## Part II: Supplementary Figures

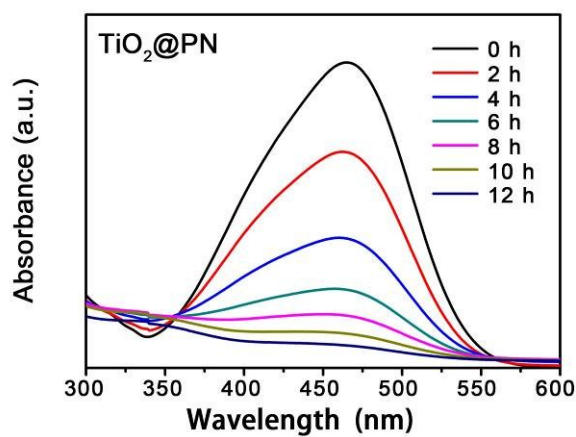

**Figure S1** The time evolution of absorption spectra upon photodecomposition of MO over  $\text{TiO}_2@\text{PN}$  under 300 W Xe lamp.

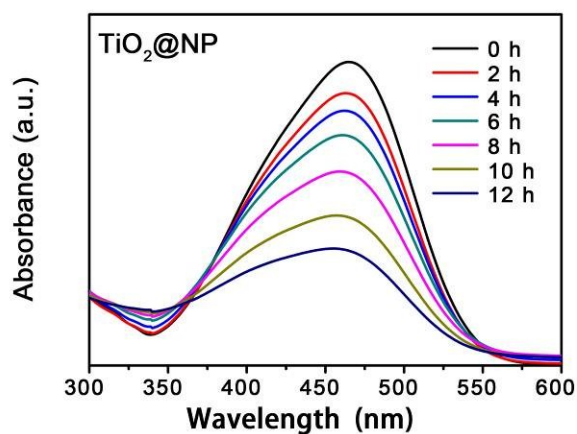

**Figure S2** The time evolution of absorption spectra upon photodecomposition of MO over  $\text{TiO}_2@\text{NP}$  under 300 W Xe lamp.

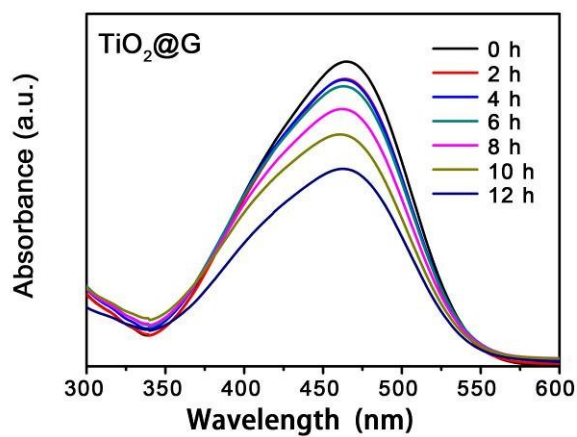

**Figure S3** The time evolution of absorption spectra upon photodecomposition of MO over  $\text{TiO}_2@\text{G}$  under 300 W Xe lamp.

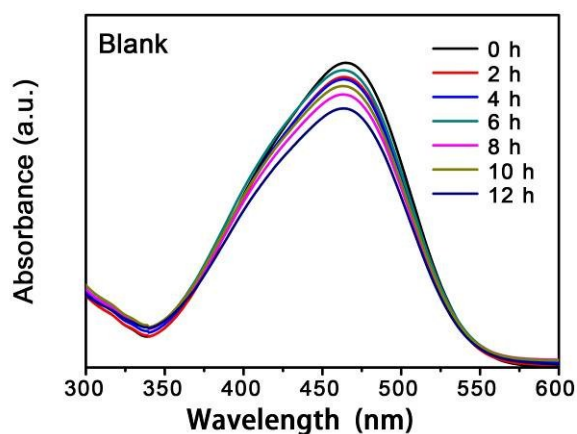

**Figure S4** The time evolution of absorption spectra upon photodecomposition of MO over blank under 300 W Xe lamp.

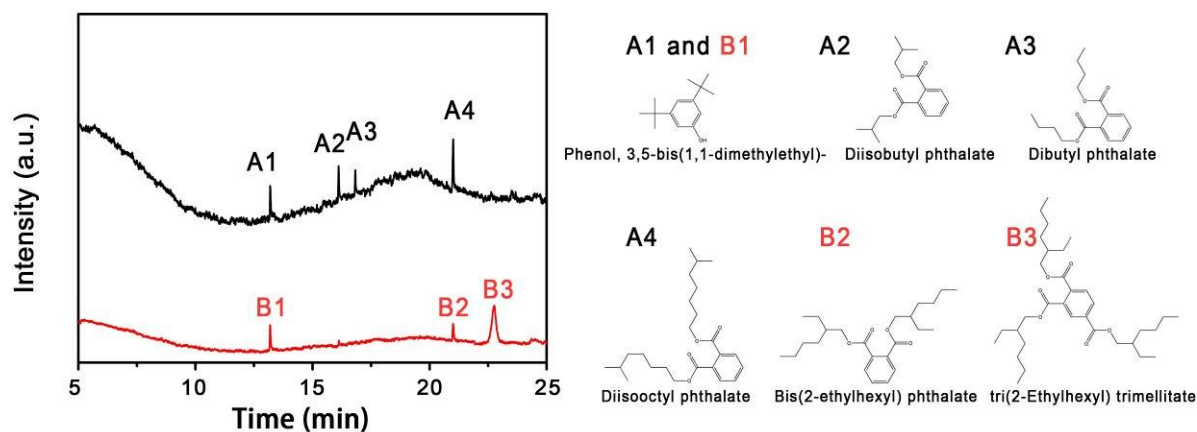

**Figure S5** The liquid chromatography scheme of the decolorization products: MO solution degraded by  $\text{TiO}_2@\text{PN}$  for 12 hours (black), the red one was degraded by  $\text{TiO}_2@\text{NP}$  for 12 hours.

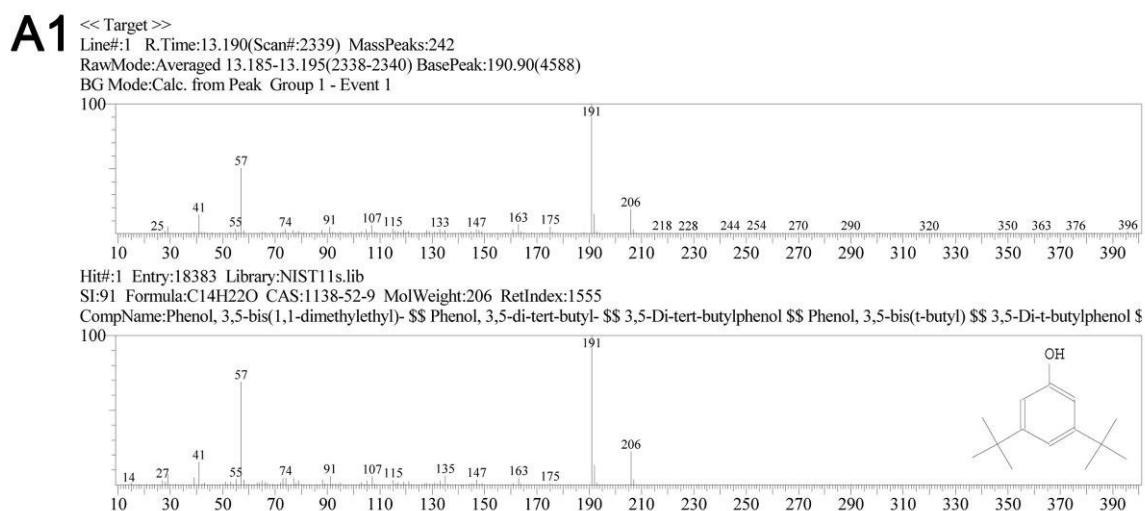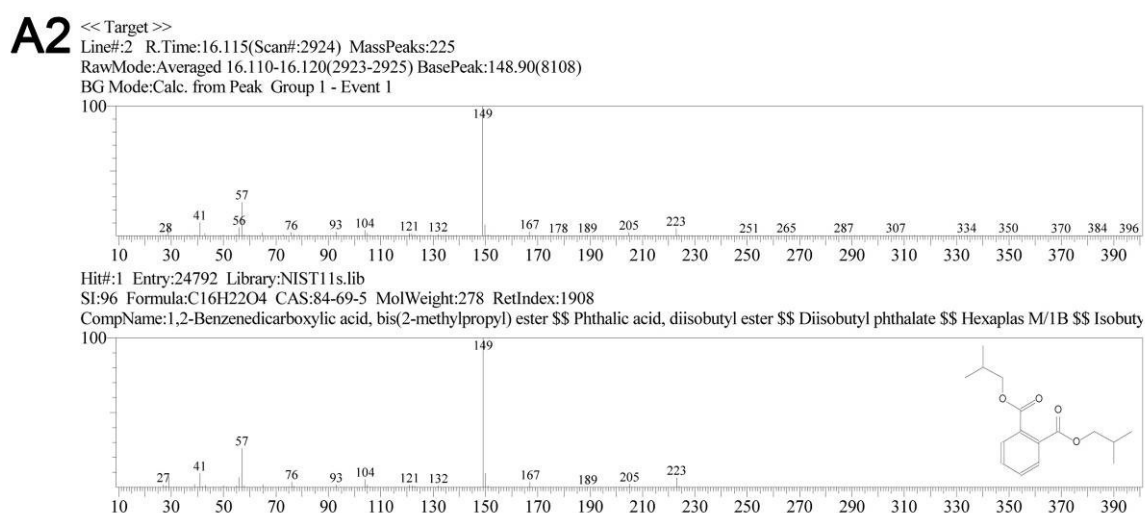

### A3 << Target >>

Line#:3 R.Time:16.825(Scan#:3066) MassPeaks:239  
RawMode:Averaged 16.820-16.830(3065-3067) BasePeak:148.90(4805)  
BG Mode:Calc. from Peak Group 1 - Event 1

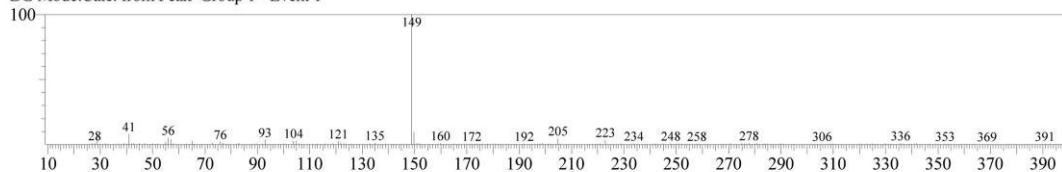

Hit#:1 Entry:24795 Library:NIST11s.lib  
SI:92 Formula:C16H22O4 CAS:84-74-2 MolWeight:278 RetIndex:2037  
CompName:Dibutyl phthalate \$\$ 1,2-Benzenedicarboxylic acid, dibutyl ester \$\$ Phthalic acid, dibutyl ester \$\$ n-Butyl phthalate \$\$ Butyl phthalate \$\$ Cellu

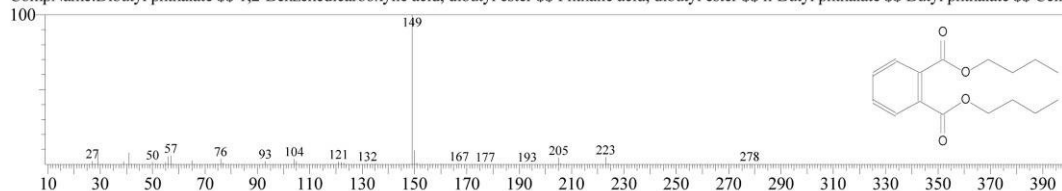

### A4 << Target >>

Line#:4 R.Time:21.010(Scan#:3903) MassPeaks:234  
RawMode:Averaged 21.005-21.015(3902-3904) BasePeak:148.90(6244)  
BG Mode:Calc. from Peak Group 1 - Event 1

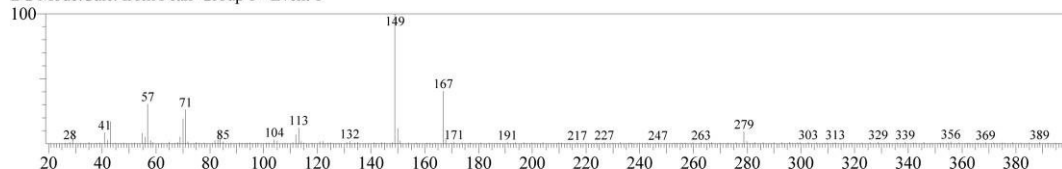

Hit#:1 Entry:178252 Library:NIST11s.lib  
SI:91 Formula:C24H38O4 CAS:131-20-4 MolWeight:390 RetIndex:2704  
CompName:Diisooctyl phthalate \$\$ Bis(6-methylheptyl) phthalate \$\$ 1,2-Benzenedicarboxylic acid, bis(6-methylheptyl) ester \$\$ Phthalic acid, bis(6-methyl

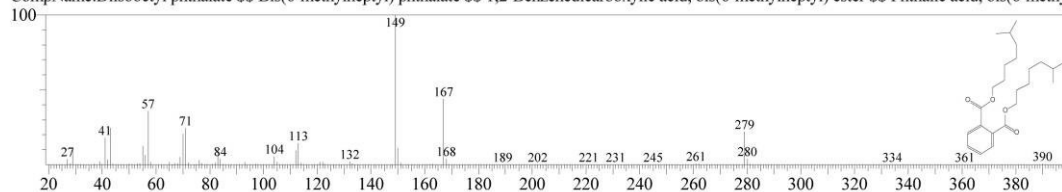

### B1 << Target >>

Line#:1 R.Time:13.190(Scan#:2339) MassPeaks:235  
RawMode:Averaged 13.185-13.195(2338-2340) BasePeak:190.90(10775)  
BG Mode:Calc. from Peak Group 1 - Event 1

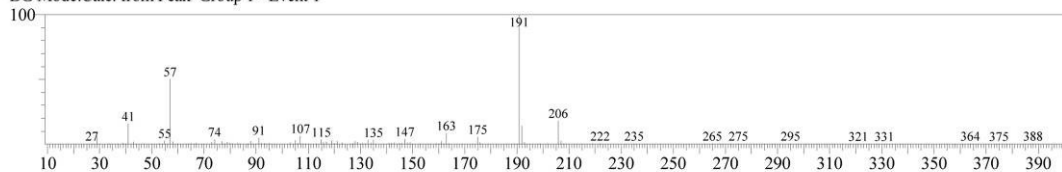

Hit#:1 Entry:18383 Library:NIST11s.lib  
SI:91 Formula:C14H22O CAS:1138-52-9 MolWeight:206 RetIndex:1555  
CompName:Phenol, 3,5-bis(1,1-dimethylethyl)- \$\$ Phenol, 3,5-di-tert-butyl- \$\$ 3,5-Di-tert-butylphenol \$\$ Phenol, 3,5-bis(t-butyl) \$\$ 3,5-Di-t-butylphenol \$

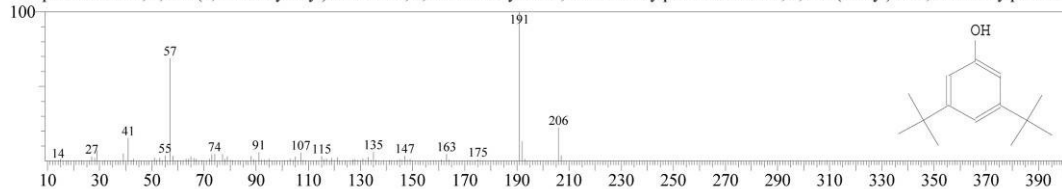

**B2** << Target >>

Line#:2 R.Time:21.000(Scan#:3901) MassPeaks:212  
RawMode:Averaged 20.995-21.005(3900-3902) BasePeak:148.90(6119)  
BG Mode:Calc. from Peak Group 1 - Event 1

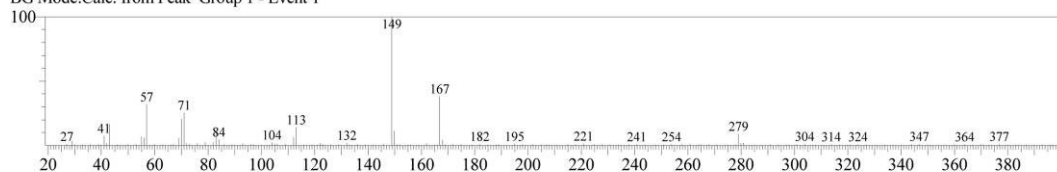

Hit#:1 Entry:29520 Library:NIST11s.lib  
SI:90 Formula:C<sub>24</sub>H<sub>38</sub>O<sub>4</sub> CAS:117-81-7 MolWeight:390 RetIndex:2704  
CompName:Bis(2-ethylhexyl) phthalate \$\$ Phthalic acid, bis(2-ethylhexyl) ester \$\$ Bis(2-ethylhexyl) 1,2-benzenedicarboxylate \$\$ Bisoflex 81 \$\$ Compoun

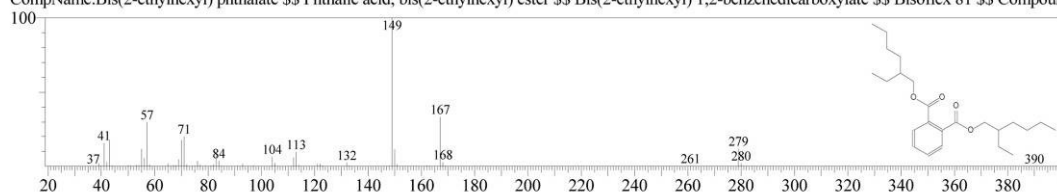

**B3** << Target >>

Line#:3 R.Time:22.765(Scan#:4254) MassPeaks:225  
RawMode:Averaged 22.760-22.770(4253-4255) BasePeak:304.85(10247)  
BG Mode:Calc. from Peak Group 1 - Event 1

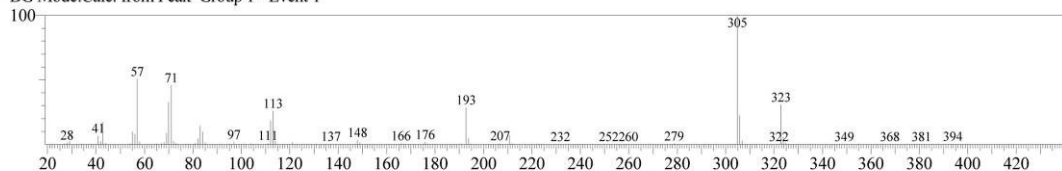

Hit#:1 Entry:208217 Library:NIST11s.lib  
SI:90 Formula:C<sub>33</sub>H<sub>54</sub>O<sub>6</sub> CAS:3319-31-1 MolWeight:546 RetIndex:3715  
CompName:tri(2-Ethylhexyl) trimellitate \$\$ 1,2,4-Benzenetricarboxylic acid, tris(2-ethylhexyl) ester \$\$ Tris-2-ethylhexyl trimellitate \$\$ Kodaflex TOTM \$\$

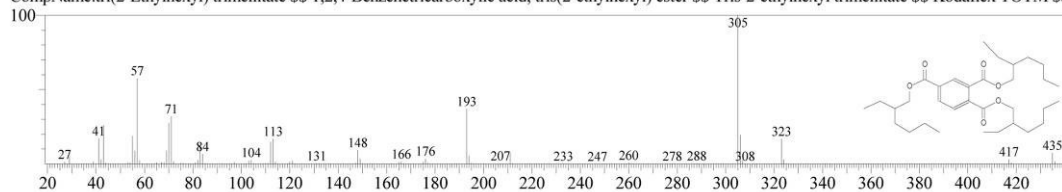

**Figure S6** The mass spectra of A1, A2, A3, A4 and B1, B2, B3 in Fig. S5.
